# Supplementary material
Source: PubMed Central journal article supplement (PMC6517653)
Supplement: ba007914-suppl1.pdf [file ba007914-suppl1.pdf]

## Supplemental Materials and Methods

### *Viral integration number in pFVIII-iMKs*

DNA was extracted from pFVIII-iMKs using DNeasy<sup>®</sup> Blood and Tissue Kit (Qiagen). Viral integration was determined via Lenti-X<sup>™</sup> Provirus Quantitation Kit (Clontech). Total RNA was isolated from  $2 \times 10^6$  iMKs using RNeasy Micro Kit (Qiagen). Total RNA (500 ng) from each sample was used to generate cDNA using High Capacity Reverse Transcription Kit (ABI). Message RNA level of target genes was determined by quantitative RT-PCR using Taqman Probes with TaqMan<sup>®</sup> Fast Advance Master Mix (ABI) via 7900HT Real-Time Cycler. Taqman Probes used were: FVIII (*F8*) Hs00252034\_m1, integrin alpha-IIb (*ITGA2B*) Hs01116228\_m1, Tata Binding Protein (*TBP*) Hs00427620\_m1, and Platelet factor 4 (*PF4*) Hs00427220\_g1. Relative transcript levels were quantified using  $2^{-\Delta\Delta C_t}$  and calculated against TBP standard<sup>1</sup>. All kits were used according to manufacturer's instructions

### *pFVIII antigen level in pFVIII-iMKs*

FVIII antigen levels in iMKs were determined using an ELISA for hFVIII as previously described<sup>2,3</sup>. Levels were compared to recombinant full-length hFVIII (Advate, Shire) and recombinant hBDFVIII (Xyntha, Pfizer).

### *Apoptotic studies of iMKs*

Analysis of apoptosis in the iMKs was performed through investigation of TUNEL-labeling using APO-bromodeoxyuridine (BrdU) TUNEL Assay Kit (Invitrogen). During TUNEL protocol, samples were stained and analyzed via flow cytometry using APC-labeled anti-CD42b (BD Biosciences)<sup>4</sup> and Alexa Fluor 488 labeled Anti-BrdU for degree of apoptosis<sup>2</sup>. All samples were compared to non-transduced controls. To further investigate apoptosis,  $1 \times 10^6$  iMKs samples were incubated with 5  $\mu$ l annexin V FITC, 10  $\mu$ l CD42b APC (BD Biosciences) in 100  $\mu$ l Tyrode's buffer (Sigma) with 0.1% bovine serum albumin (BSA) at room temperature (RT) for 30 minutes. Post incubation cells were washed twice and then resuspended in Tyrode's buffer with 0.1%. Annexin V and CD42b were analyzed via flow cytometry<sup>5</sup>.

### *Flow cytometry analysis of iMks*

Day 6 pFVIII-iMKs, controls, and mouse whole blood were stained and analyzed on FACSCanto (BD Biosciences) as previously described<sup>4,6</sup>. Antibodies used in these studies are listed in Supplemental Table 1.

**Supplement Table 1. Summary of commercial antibodies used in this paper.** All are characterized in this Table except for the two FVIII inhibitors, ESH8 and GMA-802 – including their indicated usage.

| Target       | Source           | Reactivity | Label           | Company        | Catalog Number | Usage          |
|--------------|------------------|------------|-----------------|----------------|----------------|----------------|
| CD42b        | Monoclonal Mouse | Human      | APC             | BD Biosciences | 551061         | Flow Cytometry |
| CD42b        | Monoclonal Mouse | Human      | PE              | BD Biosciences | 555473         | Flow Cytometry |
| CD41a        | Monoclonal Mouse | Human      | APC             | BD Biosciences | 559777         | Flow Cytometry |
| CD41a        | Monoclonal Mouse | Human      | PE              | BD Biosciences | 555467         | Flow Cytometry |
| CD42a        | Monoclonal Mouse | Human      | PerCP           | BD Biosciences | 340537         | Flow Cytometry |
| CD42a        | Monoclonal Mouse | Human      | PE              | BD Biosciences | 558819         | Flow Cytometry |
| Annexin V    | Bacteria         | Human      | FITC            | BD Biosciences | 556420         | Flow Cytometry |
| PAC-1        | Monoclonal Mouse | Human      | FITC            | BD Biosciences | 340507         | Flow Cytometry |
| BrdU [PBR-1] | Monoclonal Mouse | Human      | Alexa Fluor 488 | Invitrogen     | A23210         | Flow Cytometry |

PE: Phycoerythrin

APC: Allophycocyanin

FITC: fluorescein isothiocyanate

#### *iMK responsiveness to an agonist*

To examine in vitro responsiveness of iMKs,  $1 \times 10^6$  iMKs were incubated with 1 unit of thrombin/ml (T8885-1VL, Invitrogen), in Tyrode's buffer with 0.1% BSA in a final volume of 100  $\mu$ l containing 1:2000 APC-labeled anti-CD42b antibody and FITC-labeled PAC-1 as previously described<sup>7</sup>. The cells were incubated at 37°C for 30 minutes. Post incubation, 500  $\mu$ l of ice-cold 0.1% Tyrode's buffer was added. PAC-1 and CD42b binding were then analyzed via flow cytometry.

**Supplement Table 2. Parametric analysis of ROTEM studies in Figures 2A and 2B.** \* = p<0.05, \*\* = p<0.001, and \*\*\* = p<0.0001 comparing all groups to Null control using two-way ANOVA. N/A = Values could not be determined due to sample not clotting. Clotting time (CT) is the time from the start of the assay until clotting begins. Clot formation time (CFT) is the time from the start of clotting until a firmness of 20 mm is reached. Maximum clot firmness (MCF) is in mm.  $\alpha$ -angle is the angle measuring steepness at the point of initial clot formation.

|                 | WT           | h38          | 1%          | 5%           | 20%          | Null       |
|-----------------|--------------|--------------|-------------|--------------|--------------|------------|
| CT (min)        | 3.1 ± 1.4*** | 9.5 ± 1.3*** | 23.8 ± 0.9  | 14.3 ± 2.9*  | 11.7 ± 0.8** | 24.3 ± 6.4 |
| CFT (min)       | 1.8 ± 0.9    | 2.8 ± 0.4    | 13.1 ± 6.0  | 10.9 ± 7.1   | 5.4 ± 0.9    | N/A        |
| MCF             | 55.6 ± 4.0   | 52 ± 3.7     | 19.0 ± 13.8 | 40.0 ± 9.1   | 51.7 ± 2.9   | N/A        |
| $\alpha$ -angle | 70 ± 8.3     | 58.3 ± 3.8   | 16.7 ± 11.2 | 34.33 ± 18.8 | 40.67 ± 3.8  | N/A        |

**Supplement Table 3. Parametric analysis of ROTEM studies in Figures 4A and 4B.** \* = p<0.05, \*\* = p<0.001, and \*\*\* = p<0.0001 comparing all groups to Null using two-way ANOVA. N/A = Values could not be determined due to sample not clotting.

|                 | h38         | 10 nM Novo7 | 25 nM Novo7  | 10nM + P38   | Null       |
|-----------------|-------------|-------------|--------------|--------------|------------|
| CT (min)        | 9.4 ± 1.4** | 13.4 ± 3.8* | 7.2 ± 0.4*** | 7.6 ± 0.3*** | 23.9 ± 8.2 |
| CFT (min)       | 3.1 ± 0.2   | 7.5 ± 0.1   | 94.0 ± 0.5   | 93.1 ± 0.5   | N/A        |
| MCF             | 53.7 ± 4.1  | 40.5 ± 2.1  | 56.7 ± 3.5   | 55.3 ± 3.1   | N/A        |
| $\alpha$ -angle | 56.7 ± 2.5  | 34.0 ± 28.2 | 61 ± 11.5    | 56.6 ± 4.5   | N/A        |

**Supplement Table 4. Parametric analysis of ROTEM studies in Figures 5A and 5B.** The (A) and (B) for each column refers to Figures 6A and 6B, respectively. \* = p<0.05 and \*\* = p<0.001 comparing all groups to Null using two-way ANOVA. N/A = Values could not be determined due to sample not clotting.

|                 | BD(A)       | RH(A)       | NTC(A)      | BD(B)       | RH(B)       | NTC(B)        |
|-----------------|-------------|-------------|-------------|-------------|-------------|---------------|
| CT (min)        | 33.7 ± 16.9 | 20.8 ± 6.7  | 37.5 ± 21.9 | 12.8 ± 1.9* | 8.9 ± 1.1   | **31.3 ± 11.5 |
| CFT (min)       | N/A         | 14.2 ± 10.1 | N/A         | 7.6 ± 2.5   | 5.0 ± 2.4   | N/A           |
| MCF             | 23.0 ± 16.2 | 32.3 ± 15.9 | N/A         | 49.3 ± 9.3  | 52.5 ± 10.1 | 17.0 ± 15.4   |
| $\alpha$ -angle | 8.3 ± 3.1   | 24.3 ± 13.7 | N/A         | 32.0 ± 8.0  | 46.3 ± 13.9 | 11.5 ± 7.8    |

**Supplement Table 5. Parametric analysis of ROTEM studies in Figure 5C.** \* = p<0.05, \*\* = p<0.001, and \*\*\* = p<0.0001 comparing all groups to Null using two-way ANOVA. N/A = Values could not be determined due to sample not clotting.

|                 | BD            | RH            | BD + 10 nM   | RH + 10 nM   | Null       |
|-----------------|---------------|---------------|--------------|--------------|------------|
| CT (min)        | 16.9 ± 0.5*** | 14.1 ± 4.9*** | 8.7 ± 1.1*** | 7.5 ± 0.9*** | 40.1 ± 7.5 |
| CFT (min)       | 17.5 ± 3.0    | 9.9 ± 2.9     | 6.8 ± 2.2    | 6.4 ± 2.1    | N/A        |
| MCF             | 28.0 ± 4.0    | 40.0 ± 6.0    | 45.8 ± 7.3   | 45.3 ± 7.1   | N/A        |
| $\alpha$ -angle | 18.0 ± 1.0    | 27.0 ± 5.0    | 36.5 ± 6.6   | 37.5 ± 7.4   | N/A        |

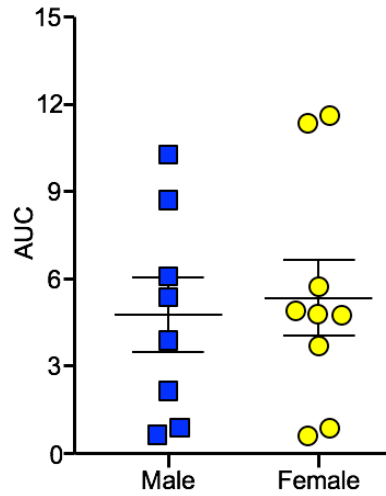

**Supplement Figure 1. Sex differences in the FeCl<sub>3</sub> carotid artery model.**

FVIII<sup>null</sup> littermate mice of both sexes were studied in the FeCl<sub>3</sub> carotid artery injury model at 7-8 weeks of age, each mouse receiving 4X10<sup>6</sup> p38 platelets intravenously. AUC for total blood flow over the observed 30 minutes following injury are shown as are the mean ± 1 SEM. p=0.74 using a two-tailed Student t test.

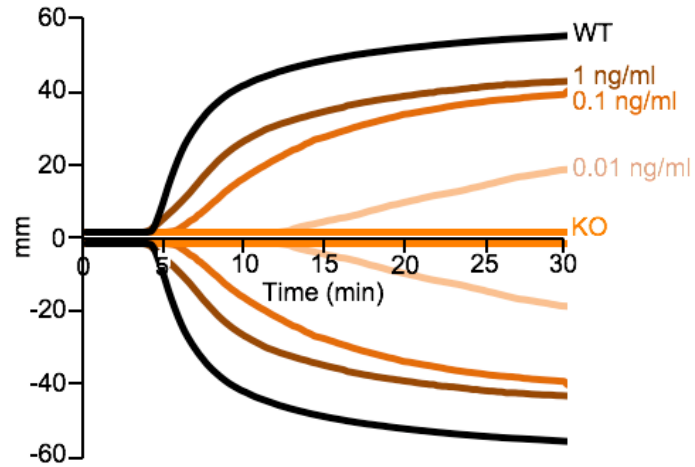

**Supplement Figure 2. Addition of soluble rFVIII improves clotting in in vitro ROTEM assay.**

Studies similar to Figure 1 except that different concentrations of rFVIII were added to 110  $\mu$ l of FVIII<sup>null</sup> (KO) whole blood to achieve the concentrations noted. Each curve represents 4 independent studies.

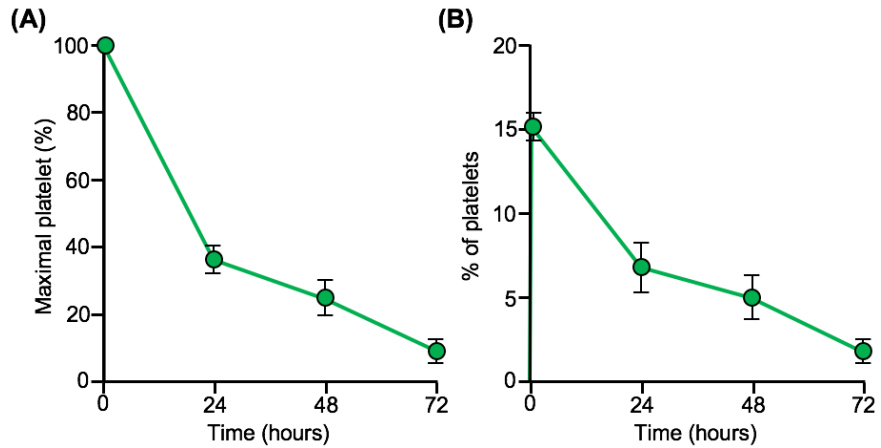

**Supplement Figure 3. Half-life of isolated mouse platelets infused into FVIII<sup>null</sup> mice.**

**(A)** Half-life based on infusing  $1-4 \times 10^8$  human  $\alpha$ IIb-expressing mouse<sup>8</sup> platelets into FVIII<sup>null</sup> mice. Total  $\alpha$ IIb-expressing platelets were tracked over 72 hours via flow cytometry. Measurement of remaining infused human platelets normalized to level at 5-minutes post-infusion. Mean  $\pm$  1 SEM are shown. N = 4 independent studies. **(B)** Calcein-AM  $4 \times 10^8$  loaded WT platelets infused into FVIII<sup>null</sup> mice. Percent of circulating platelets that contained calcein are shown. Mean  $\pm$  1 SEM are shown. N = 3 independent studies.

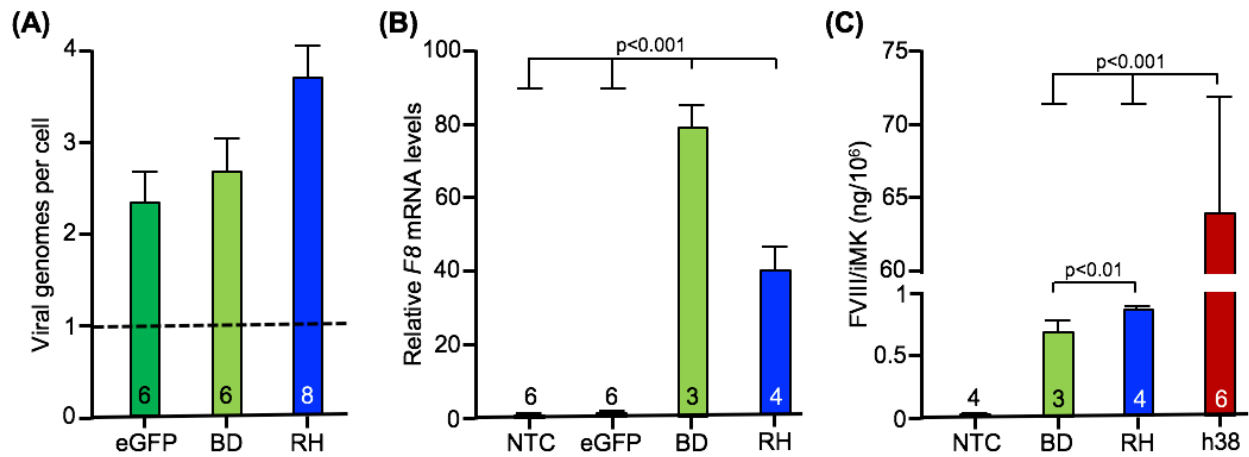

### Supplement Figure 4. FVIII expression in iMks.

**(A)** DNA from  $10^6$  iMks was collected and analyzed for lentiviral integration. Viral genomes per cell were relative to non-transduced control (NTC, dashed line). Mean  $\pm$  1 SEM are shown with the number of independent experiments indicated in each bar. P values determined by one-way ANOVA. **(B)** 500 ng of total RNA was analyzed for *F8* message. NTC and eGFP-expressing iMks were used as negative controls. Mean  $\pm$  1 SEM are shown with number of independent experiments indicated in each bar. P values determined by one-way ANOVA. **(C)**  $2 \times 10^6$  iMks were lysed to extract cellular content. Whole cell lysates were analyzed using human FVIII ELISA. Mean  $\pm$  1 SEM are shown with number of independent experiments indicated in each bar. P values determined by one-way ANOVA. BD = pBDFVIII-iMks, RH = pBDFVIII<sup>RH</sup>-Mks, and h38 = Line h38 mouse megakaryocytes.

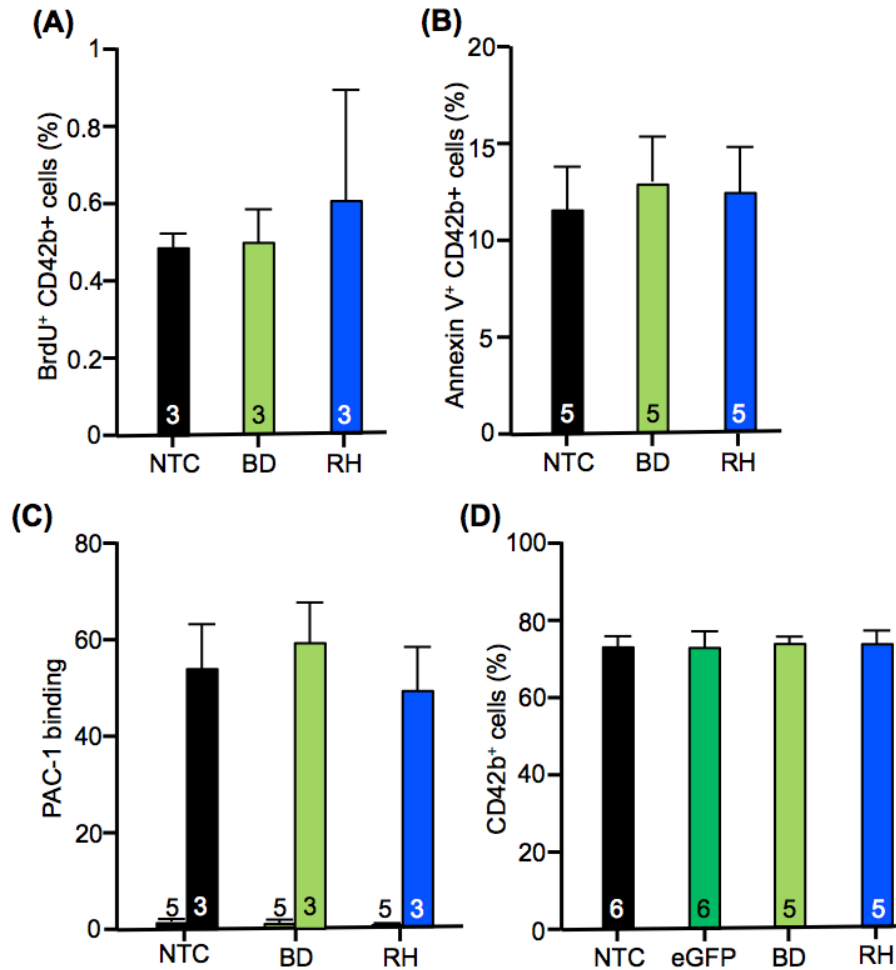

### Supplemental Figure 5. pFVIII effects on iMks.

**(A)** TUNEL Assay Kit-stained for BrdU and co-stained for CD42b to examine for pFVIII-iMks apoptosis. Mean  $\pm$  1 SEM are shown with number of independent experiments indicated in each bar. No difference was noted by ANOVA analysis between the examined iMks. **(B)** Annexin V binding as an indicator of apoptosis of iMks. Mean  $\pm$  1 SEM are shown with number of independent experiments indicated in each bar. No difference was noted by ANOVA analysis between the examined iMks. **(C)** Agonist responsiveness of iMks to 1 unit of thrombin/ml and measuring FITC-labeled PAC-1 antibody binding. For each iMK, the left bar is pre-thrombin and the right is post-thrombin activation. Mean  $\pm$  1 SEM are shown with number of independent experiments for each iMK condition is shown.  $P < 0.001$  for pre- versus post-thrombin activation for each iMK condition by one-way ANOVA, but no difference was noted by ANOVA analysis between the examined iMks. **(D)** Studies of iMK injury as indicated by loss of CD42b signal in the CD41+ iMks. Percent of CD41+ iMks that were also CD42b+ are shown. Mean  $\pm$  1 SEM are



shown with number of independent experiments indicated in each bar. No difference was noted by ANOVA analysis between the examined iMKs.

## References

1. Livak KJ, Schmittgen TD. Analysis of relative gene expression data using real-time quantitative PCR and the 2(-Delta Delta C(T)) method. *Methods*. 2001;25(4):402-408.
2. Greene TK, Lyde RB, Bailey SC, et al. Apoptotic effects of platelet factor VIII on megakaryopoiesis: implications for a modified human FVIII for platelet-based gene therapy. *J Thromb Haemost*. 2014;12(12):2102-2112.
3. Yarovoi HV, Kufirin D, Eslin DE, et al. Factor VIII ectopically expressed in platelets: efficacy in hemophilia A treatment. *Blood*. 2003;102(12):4006-4013.
4. Sullivan SK, Mills JA, Koukouritaki SB, et al. High-level transgene expression in induced pluripotent stem cell-derived megakaryocytes: correction of Glanzmann thrombasthenia. *Blood*. 2014;123(5):753-757.
5. Sim X, Poncz M, Gadue P, French DL. Understanding platelet generation from megakaryocytes: implications for in vitro-derived platelets. *Blood*. 2016;127(10):1227-1233.
6. Mills JA, Paluru P, Weiss MJ, Gadue P, French DL. Hematopoietic differentiation of pluripotent stem cells in culture. *Methods Mol Biol*. 2014;1185:181-194.
7. Greene TK, Wang C, Hirsch JD, et al. In vivo efficacy of platelet-delivered, high specific activity factor VIII variants. *Blood*. 2010;116(26):6114-6122.
8. Fuentes R, Wang Y, Hirsch J, et al. Infusion of mature megakaryocytes into mice yields functional platelets. *J Clin Invest*. 2010;120(11):3917-3922.
